# Supplementary material
Source: PubMed Central journal article supplement (PMC8867862)

# SUPPLEMENTAL MATERIAL

## Appendix 1 – Additional examples of project resources

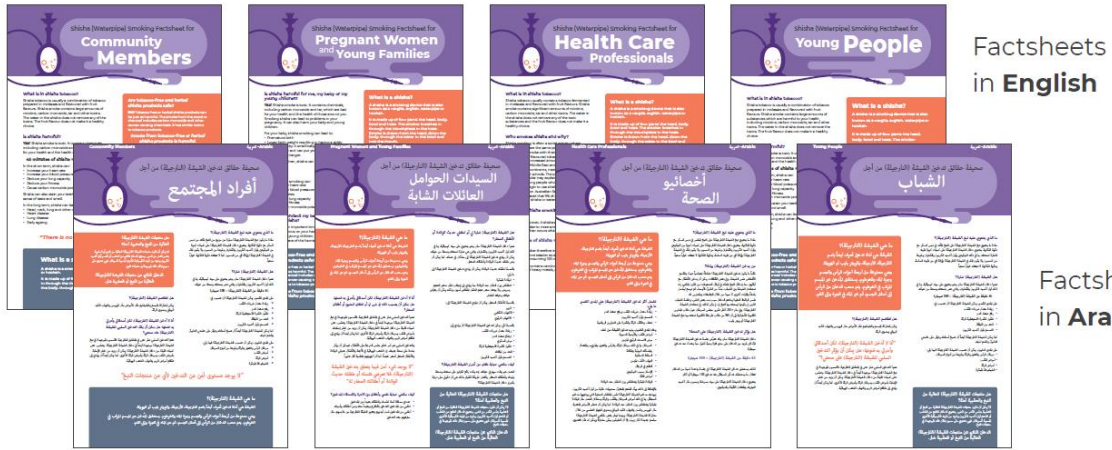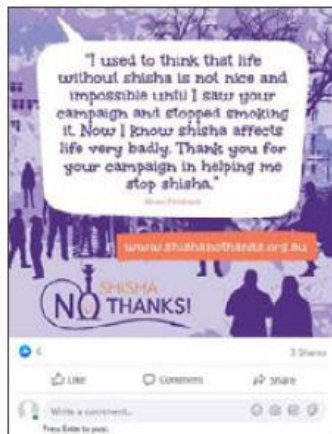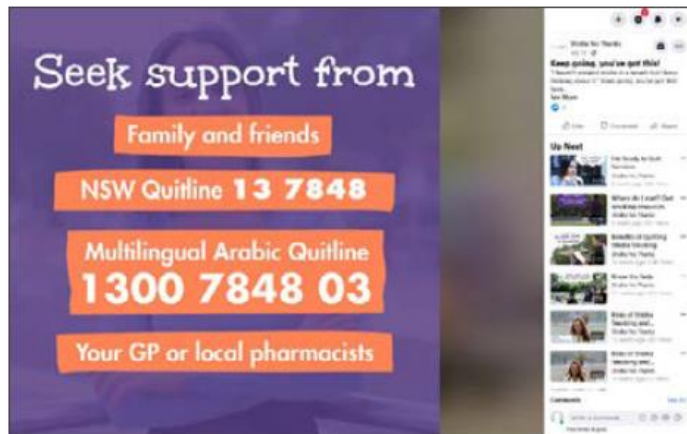

Supplement: 12889_2022_12792_MOESM1_ESM.pdf [file 12889_2022_12792_MOESM1_ESM.pdf]
