# Supplementary material
Source: PubMed Central journal article supplement (PMC8867862)
Supplement: 12889_2022_12792_MOESM2_ESM.pdf [file 12889_2022_12792_MOESM2_ESM.pdf]

## SUPPLEMENTAL MATERIAL

### Appendix 2 – Recruitment material

#### Flyer at local events



The flyer has an orange background. At the top left, there is a white card with a black shisha icon and a pen. At the top right, there is a white smartphone. The main text is in white and orange. The title 'Calling for Research Participants' is in a large, white, handwritten-style font. Below it, the text 'Do you smoke **shisha** or know someone who does? Are you **18-35 years old**?' is in white. The bottom section is white with black text.

Calling for Research Participants

Do you smoke **shisha** or know someone who does?  
Are you **18-35 years old**?

The University of New South Wales is looking for 18-35 year olds to take part in a research study about shisha smoking.

All it involves is answering a short online survey, and then a couple of SMS questions each month throughout the coming year. For your time, you'll be reimbursed with 2x \$50 gift cards.

Find out more or sign up at  
[https://unsw.au1.qualtrics.com/jfe/form/SV\\_41PYW93Nn9JY6zz](https://unsw.au1.qualtrics.com/jfe/form/SV_41PYW93Nn9JY6zz)

#### Social media post



The social media post has an orange background. On the left, the text 'Shisha Smoking Study' is in white, with 'Shisha Smoking' on one line and 'Study' on the next. To the right is a white circle containing a black shisha icon. Below this is a dashed line. The text '18 - 35 YEARS OLD?' is in white. Below that is 'INTERESTED IN THE TOPIC OF SHISHA SMOKING?' in white. Then 'SHARE YOUR THOUGHTS!' in white. At the bottom is the URL 'https://unsw.au1.qualtrics.com/jfe/form/SV\_41PYW93Nn9JY6zz' in white.

Shisha Smoking Study

18 - 35 YEARS OLD?

INTERESTED IN THE TOPIC OF SHISHA SMOKING?

SHARE YOUR THOUGHTS!

[https://unsw.au1.qualtrics.com/jfe/form/SV\\_41PYW93Nn9JY6zz](https://unsw.au1.qualtrics.com/jfe/form/SV_41PYW93Nn9JY6zz)

We're looking for 18-35 year olds to take part in a research study on shisha smoking. All it involves is a couple of SMS questions each month. For your time, you will receive 2x \$50 e-gift cards from an Australian store. Sign up at [https://unsw.au1.qualtrics.com/jfe/form/SV\\_41PYW93Nn9JY6zz](https://unsw.au1.qualtrics.com/jfe/form/SV_41PYW93Nn9JY6zz).

#shisha #nargile #hookah #recruiting #health #haveyoursay

*Note: Recruitment material stated that participants would receive 2 x \$50 e-gift cards as reimbursement for their time. However, this was increased to 3x \$50 e-gift cards during the study to increase retention rates for the post-campaign data collection.*
