# Supplementary material
Source: PubMed Central journal article supplement (PMC8867862)
Supplement: 12889_2022_12792_MOESM3_ESM.pdf [file 12889_2022_12792_MOESM3_ESM.pdf]

## SUPPLEMENTAL MATERIAL

### Appendix 3 - Recruitment survey questions

| Question/ Text                                                                                                                                                                                                                                                                                                        | Responses                                                                                                                                                                                 |
|-----------------------------------------------------------------------------------------------------------------------------------------------------------------------------------------------------------------------------------------------------------------------------------------------------------------------|-------------------------------------------------------------------------------------------------------------------------------------------------------------------------------------------|
| Page 1                                                                                                                                                                                                                                                                                                                |                                                                                                                                                                                           |
| Q1. Would you prefer to complete this survey in English or Arabic?<br>هل تفضل إكمال هذا الاستبيان باللغة الإنجليزية أو العربية؟                                                                                                                                                                                       | <input type="radio"/> English<br><input type="radio"/> عربي (Arabic)                                                                                                                      |
| Page 2                                                                                                                                                                                                                                                                                                                |                                                                                                                                                                                           |
| Online Participant Information Statement (Appendix 3) and Consent Form (Appendix 4)                                                                                                                                                                                                                                   |                                                                                                                                                                                           |
| Q2. Do you consent to being contacted with via SMS with 2 survey questions each month over the next 13 months, and for your de-identified information to be used in an evaluation study?                                                                                                                              | Tick box (compulsory question)                                                                                                                                                            |
| Page 3                                                                                                                                                                                                                                                                                                                |                                                                                                                                                                                           |
| Q3. To ensure you are eligible for this study, how old are you?                                                                                                                                                                                                                                                       | Free text response.<br>Validate answer – must be between 18 and 35 (compulsory question)                                                                                                  |
| Q4. What is your gender?                                                                                                                                                                                                                                                                                              | <input type="radio"/> Male<br><input type="radio"/> Female<br><input type="radio"/> Prefer not to say                                                                                     |
| Q5. What is your postcode?                                                                                                                                                                                                                                                                                            | Free text response.<br>Validate answer – must be between 0000 – 9999 (compulsory question)                                                                                                |
| Q6. What language do you speak at home?                                                                                                                                                                                                                                                                               | <input type="radio"/> English<br><input type="radio"/> Arabic<br><input type="radio"/> English and Arabic<br><input type="radio"/> Other (please specify)                                 |
| Q7. In the past 12 months, have you smoked shisha? (In these questions, by shisha, we also mean argihle, hookah, hubbly bubbly or waterpipe smoking).                                                                                                                                                                 | <input type="radio"/> Yes<br><input type="radio"/> No<br><input type="radio"/> Not sure                                                                                                   |
| Q8. If yes, how often do you currently smoke shisha?                                                                                                                                                                                                                                                                  | <input type="radio"/> Daily<br><input type="radio"/> At least once per week, but less than daily<br><input type="radio"/> Less than once per week<br><input type="radio"/> Not applicable |
| Q9. Please provide your mobile phone number for subsequent SMS questions:                                                                                                                                                                                                                                             | Free text response.<br>Validate answer – must be between 0 – 9999999999 (compulsory question)                                                                                             |
| Page 4                                                                                                                                                                                                                                                                                                                |                                                                                                                                                                                           |
| Thanks for participating in this study and for completing the online survey questions. We will be in touch via SMS soon.<br>If you have any further questions about the study, or would like to opt out at any point, please visit the project website: <a href="https://bit.ly/2E9gbFl">https://bit.ly/2E9gbFl</a> . |                                                                                                                                                                                           |
| Q10. Would you like to be kept updated about the project's activities via email?<br>If so, please provide your contact email below:<br>(Please note, we will only contact you for the purposes of this project and will not share your phone number or email address with any other parties.)                         | Free text response.                                                                                                                                                                       |
