# Supplementary material
Source: PubMed Central journal article supplement (PMC8867862)
Supplement: 12889_2022_12792_MOESM4_ESM.pdf [file 12889_2022_12792_MOESM4_ESM.pdf]

## SUPPLEMENTAL MATERIAL

### Appendix 4 - Survey questions

| Time                                                       | Question/ Text                                                                                                                                                                                                                                                                                                                                                                                                                                                                                                                                                                                                                                                                                                                        |
|------------------------------------------------------------|---------------------------------------------------------------------------------------------------------------------------------------------------------------------------------------------------------------------------------------------------------------------------------------------------------------------------------------------------------------------------------------------------------------------------------------------------------------------------------------------------------------------------------------------------------------------------------------------------------------------------------------------------------------------------------------------------------------------------------------|
| Immediately after completing the online recruitment survey | Hi [name], thanks for being part of our research study. We'll be in touch with survey questions soon. For more info visit <a href="https://bit.ly/2E9gbFl">https://bit.ly/2E9gbFl</a> .                                                                                                                                                                                                                                                                                                                                                                                                                                                                                                                                               |
| Baseline (pre-project) data collection                     |                                                                                                                                                                                                                                                                                                                                                                                                                                                                                                                                                                                                                                                                                                                                       |
| Week 1<br>Aug 2019                                         | Hi, thanks for being part of the waterpipe (shisha) study. To answer the survey questions, just reply with the number that matches your response. Standard messaging rates apply. Text "STOP" to opt out of this survey. T&Cs: <a href="https://bit.ly/2E9gbFl">https://bit.ly/2E9gbFl</a><br>Shisha study question 1: Have you recently seen, read or heard anything online, in the media, or your community about the harms of smoking shisha? (E.g. stories, discussions, information or news). It might have been on TV, radio, in magazines or newspapers, on the internet or somewhere else. Reply with a number (1, 2 or 3).<br><ol style="list-style-type: none"> <li>1. Yes</li> <li>2. No</li> <li>3. Don't know</li> </ol> |
| Week 2<br>Aug 2019                                         | If you answered yes to the previous shisha question, can you describe in a few words what you saw, read or heard?                                                                                                                                                                                                                                                                                                                                                                                                                                                                                                                                                                                                                     |
| Week 3<br>Aug 2019                                         | Shisha study: Don't forget to reply to all questions to receive your x3 \$50 vouchers. You will receive the 1st one next week after replying to question 4.<br>Question 3: What do you think of the following statement? Shisha contains cancer-causing substances? Reply with a number (1-6).<br><ol style="list-style-type: none"> <li>1. Strongly agree</li> <li>2. Somewhat agree</li> <li>3. Neutral</li> <li>4. Somewhat disagree</li> <li>5. Strongly disagree</li> <li>6. Don't know</li> </ol>                                                                                                                                                                                                                               |
| Week 4<br>Aug 2019                                         | Shisha study question 4: How would you rate smoking shisha compared to cigarettes considering its health effects? Reply with a number (1-4).<br><ol style="list-style-type: none"> <li>1. Same</li> <li>2. Less harmful</li> <li>3. More harmful</li> <li>4. Don't know</li> </ol>                                                                                                                                                                                                                                                                                                                                                                                                                                                    |
| Week 4<br>Aug 2019                                         | [For participants who responded to most of the questions so far]<br>You have received a \$50 gift card from UNSW Shisha study. Expires 09 Sep 2020*. Message: Thanks for being part of your research study. Here's a \$50 e-gift.<br>* Gift card expires 3 years from issue date.                                                                                                                                                                                                                                                                                                                                                                                                                                                     |
| Week 5<br>Sep 2019                                         | Shisha study question 5: What do you think of the following statement? Smoking shisha can cause damage to your body. Reply with a number (1-6).<br><ol style="list-style-type: none"> <li>1. Strongly agree</li> <li>2. Somewhat agree</li> <li>3. Neutral</li> <li>4. Somewhat disagree</li> <li>5. Strongly disagree</li> <li>6. Don't know</li> </ol>                                                                                                                                                                                                                                                                                                                                                                              |
| Week 6<br>Sep 2019                                         | Shisha study question 6: In the past month, have you thought about reducing the amount of shisha you smoke? Reply with a number (1-5).<br><ol style="list-style-type: none"> <li>1. Yes, within the next 30 days</li> <li>2. Yes, within the next 6 months</li> </ol>                                                                                                                                                                                                                                                                                                                                                                                                                                                                 |

|                                |                                                                                                                                                                                                                                                                                                                                                                                                                                                                                 |
|--------------------------------|---------------------------------------------------------------------------------------------------------------------------------------------------------------------------------------------------------------------------------------------------------------------------------------------------------------------------------------------------------------------------------------------------------------------------------------------------------------------------------|
|                                | <ol style="list-style-type: none"> <li>3. Yes, completely stopping shisha smoking</li> <li>4. No</li> <li>5. Don't know</li> </ol>                                                                                                                                                                                                                                                                                                                                              |
| Week 7<br>Sep 2019             | <p>Shisha study question 7: Have you recently talked to someone (e.g. family or friend) about the harms of smoking shisha? Reply with a number (1-3).</p> <ol style="list-style-type: none"> <li>1. Yes</li> <li>2. No</li> <li>3. Don't know</li> </ol>                                                                                                                                                                                                                        |
| Week 8<br>Oct 2019             | <p>Shisha study question 8: Do you know of any websites or phone services that someone could use to get information or support to help quit smoking shisha? Reply with a number (1-3).</p> <ol style="list-style-type: none"> <li>1. Yes</li> <li>2. No</li> <li>3. Don't know</li> </ol>                                                                                                                                                                                       |
| Week 8<br>Oct 2019             | <p>[For participants who have responded to most of the questions so far]<br/>         You have received a \$50 gift card from UNSW Shisha study. Expires 09 Sep 2020*. Message: Thanks for being part of your research study. Here's a \$50 e-gift.<br/>         * Gift card expires 3 years from issue date.</p>                                                                                                                                                               |
| Campaign launch (15 Oct 2019)  |                                                                                                                                                                                                                                                                                                                                                                                                                                                                                 |
| During project data collection |                                                                                                                                                                                                                                                                                                                                                                                                                                                                                 |
| Week 12<br>Oct 2019            | <p>Shisha study question 9: Have you ever searched for information about smoking shisha on the internet? Reply with a number (1-3).</p> <ol style="list-style-type: none"> <li>1. Yes</li> <li>2. No</li> <li>3. Not sure</li> </ol>                                                                                                                                                                                                                                            |
| Week 13<br>Oct 2019            | <p>Shisha study question 10: If you have ever searched for information about smoking shisha on the internet, what was it about? Reply with a number (1-5).</p> <ol style="list-style-type: none"> <li>1. How to smoke shisha</li> <li>2. Where to buy or smoke shisha</li> <li>3. What are the harms of smoking shisha</li> <li>4. How to quit smoking shisha</li> <li>5. Other</li> </ol>                                                                                      |
| Week 14<br>Nov 2019            | <p>Shisha study question 11: If you smoke shisha, where do you mostly smoke it? Reply with a number (1-5).</p> <ol style="list-style-type: none"> <li>1. At home</li> <li>2. At restaurant</li> <li>3. At a park, or other public area</li> <li>4. Other</li> <li>5. I don't smoke shisha</li> </ol>                                                                                                                                                                            |
| Week 15<br>Nov 2019            | <p>Shisha study question 12: What's the main reason(s) you smoke shisha? (in a few words)</p>                                                                                                                                                                                                                                                                                                                                                                                   |
| Week 16<br>Nov 2019            | <p>Shisha study question 13: Do you currently smoke cigarettes, pipes or other tobacco products (excluding shisha)? Reply with a number (1-3).</p> <ol style="list-style-type: none"> <li>1. Yes</li> <li>2. No</li> <li>3. Don't know</li> </ol>                                                                                                                                                                                                                               |
| Week 17<br>Nov 2019            | <p>Shisha study question 14: How often do you now smoke cigarettes, pipes or other tobacco products (excluding shisha)? Reply with a number (1-6).</p> <ol style="list-style-type: none"> <li>1. Daily</li> <li>2. At least weekly (not daily)</li> <li>3. Less often than weekly</li> <li>4. Not at all, but I have smoked in the last 12 months</li> <li>5. Not at all and I have not smoked in the last 12 months</li> <li>6. Not applicable, I have never smoked</li> </ol> |

| Follow-up data collection |                                                                                                                                                                                                                                                                                                                                                                                                                                             |
|---------------------------|---------------------------------------------------------------------------------------------------------------------------------------------------------------------------------------------------------------------------------------------------------------------------------------------------------------------------------------------------------------------------------------------------------------------------------------------|
| 13 Jan 2020               | <p>Shisha study question 1: Have you recently seen, read or heard anything online, in the media, or your community about the harms of smoking shisha? (E.g. stories, discussions, information or news). It might have been on TV, radio, in magazines or newspapers, on the internet or somewhere else. Reply with a number (1, 2 or 3).</p> <ol style="list-style-type: none"> <li>1. Yes</li> <li>2. No</li> <li>3. Don't know</li> </ol> |
| 20 Jan 2020               | <p>If you answered yes to the previous shisha question, can you describe in a few words what you saw, read or heard?</p>                                                                                                                                                                                                                                                                                                                    |
| 28 Jan 2020               | <p>Shisha study question 3: What do you think of the following statement? Shisha contains cancer-causing substances. Reply with a number (1-6).</p> <ol style="list-style-type: none"> <li>1. Strongly agree</li> <li>2. Somewhat agree</li> <li>3. Neutral</li> <li>4. Somewhat disagree</li> <li>5. Strongly disagree</li> <li>Don't know</li> </ol>                                                                                      |
| 3 Feb 2020                | <p>Shisha study question 4: How would you rate smoking shisha compared to cigarettes considering its health effects? Reply with a number (1-4).</p> <ol style="list-style-type: none"> <li>1. Same</li> <li>2. Less harmful</li> <li>3. More harmful</li> <li>4. Don't know</li> </ol>                                                                                                                                                      |
| 10 Feb 2020               | <p>Shisha study question 5: What do you think of the following statement? Smoking shisha can cause damage to your body. Reply with a number (1-6).</p> <ol style="list-style-type: none"> <li>1. Strongly agree</li> <li>2. Somewhat agree</li> <li>3. Neutral</li> <li>4. Somewhat disagree</li> <li>5. Strongly disagree</li> <li>6. Don't know</li> </ol>                                                                                |
| 17 Feb 2020               | <p>Shisha study question 6: In the past month, have you thought about reducing the amount of shisha you smoke? Reply with a number (1-5).</p> <ol style="list-style-type: none"> <li>1. Yes, within the next 30 days</li> <li>2. Yes, within the next 6 months</li> <li>3. Yes, completely stopping shisha smoking</li> <li>4. No</li> <li>5. Don't know</li> </ol>                                                                         |
| 24 Feb 2020               | <p>Shisha study question 7: Have you recently talked to someone (e.g. family or friend) about the harms of smoking shisha? Reply with a number (1-3).</p> <ol style="list-style-type: none"> <li>1. Yes</li> <li>2. No</li> <li>3. Don't know</li> </ol>                                                                                                                                                                                    |
| 2 Mar 2020                | <p>Shisha study question 8: Do you know of any websites or phone services that someone could use to get information or support to help quit smoking shisha? Reply with a number (1-3).</p> <ol style="list-style-type: none"> <li>1. Yes</li> <li>2. No</li> <li>3. Don't know</li> </ol>                                                                                                                                                   |
| 2 Mar 2020                | <p>[For participants who have responded to most of the questions so far]<br/> You have received a \$50 gift card from UNSW Shisha study. Expires 09 Sep 2020*. Message: Thanks for being part of your research study. Here's a \$50 e-gift.<br/> * Gift card expires 3 years from issue date.</p>                                                                                                                                           |

2 Mar 2020

There are no more questions for this research study, and we will not be contacting you via SMS again. If you would like to be informed of the results of the study, please visit <http://bit.do/foTef> for contact details. Thanks again for being part of the study.
