# Supplementary material
Source: PubMed Central journal article supplement (PMC8867862)
Supplement: 12889_2022_12792_MOESM5_ESM.pdf [file 12889_2022_12792_MOESM5_ESM.pdf]

## SUPPLEMENTAL MATERIAL

### Appendix 5 - Number of responses for before-after questions

|                                                                               | Baseline<br>(n) | Post-<br>campaign<br>(n) | Paired data<br>(Both Baseline<br>and Post-<br>campaign) (n) |
|-------------------------------------------------------------------------------|-----------------|--------------------------|-------------------------------------------------------------|
| Have you seen, heard or read anything about harms of shisha smoking           | 101             | 89                       | <b>80</b>                                                   |
| Shisha contains cancer-causing substances                                     | 105             | 87                       | <b>84</b>                                                   |
| What are the health effects of smoking shisha compared to cigarettes?         | 103             | 87                       | <b>81</b>                                                   |
| Smoking shisha can cause damage to your body                                  | 112             | 85                       | <b>85</b>                                                   |
| Have you thought about reducing the amount of shisha you smoke?               | 106             | 93                       | <b>92</b>                                                   |
| Have you talked to someone about the harms of smoking shisha?                 | 76              | 93                       | <b>70</b>                                                   |
| Do you know where to find information or support to help quit smoking shisha? | 105             | 87                       | <b>80</b>                                                   |
