# Supplementary material
Source: PubMed Central journal article supplement (PMC8867862)
Supplement: 12889_2022_12792_MOESM6_ESM.pdf [file 12889_2022_12792_MOESM6_ESM.pdf]

## Appendix 6 - Subgroup Analysis

### Gender

#### Men

|                                                                                             | Baseline |             | Post-campaign |             | <i>p-value</i> |
|---------------------------------------------------------------------------------------------|----------|-------------|---------------|-------------|----------------|
|                                                                                             | n        | %           | n             | %           |                |
| <b>Have you seen, heard or read anything about harms of shisha smoking (n=29)</b>           |          |             |               |             | <i>p=0.06</i>  |
| Yes                                                                                         | 15       | <b>51.7</b> | 23            | <b>79.3</b> |                |
| No or Don't know                                                                            | 14       | <b>48.3</b> | 6             | <b>20.7</b> |                |
| <b>Shisha contains cancer-causing substances (n=32)</b>                                     |          |             |               |             | <i>p=0.64</i>  |
| Strongly agree                                                                              | 17       | <b>53.1</b> | 19            | <b>59.4</b> |                |
| Somewhat agree                                                                              | 10       | <b>31.3</b> | 9             | <b>28.1</b> |                |
| Neutral / Don't know                                                                        | 4        | <b>12.5</b> | 3             | <b>9.4</b>  |                |
| Somewhat disagree                                                                           | 1        | <b>3.1</b>  | 1             | <b>3.1</b>  |                |
| Strongly disagree                                                                           | 0        | <b>0.0</b>  | 0             | <b>0.0</b>  |                |
| <b>What are the health effects of smoking shisha compared to cigarettes? (n=29)</b>         |          |             |               |             | <i>p=0.73</i>  |
| Same or more harmful                                                                        | 14       | <b>48.3</b> | 16            | <b>55.2</b> |                |
| Less harmful or Don't know                                                                  | 15       | <b>51.7</b> | 13            | <b>44.8</b> |                |
| <b>Smoking shisha can cause damage to your body (n=31)</b>                                  |          |             |               |             | <i>p=0.31</i>  |
| Strongly agree                                                                              | 14       | <b>45.2</b> | 19            | <b>61.3</b> |                |
| Somewhat agree                                                                              | 14       | <b>45.2</b> | 8             | <b>25.8</b> |                |
| Neutral / Don't know                                                                        | 2        | <b>6.5</b>  | 4             | <b>12.9</b> |                |
| Somewhat disagree                                                                           | 1        | <b>3.2</b>  | 0             | <b>0.0</b>  |                |
| Strongly disagree                                                                           | 0        | <b>0.0</b>  | 0             | <b>0.0</b>  |                |
| <b>Have you thought about reducing the amount of shisha you smoke? (n=35)</b>               |          |             |               |             | <i>p=0.42</i>  |
| Yes, [Within the next 30 days/ next 6 months/ completely stopping]                          | 19       | <b>54.3</b> | 23            | <b>65.7</b> |                |
| No / Don't know                                                                             | 16       | <b>45.7</b> | 12            | <b>34.3</b> |                |
| <b>Have you talked to someone about the harms of smoking shisha? (n=25)</b>                 |          |             |               |             | <i>p=0.22</i>  |
| Yes                                                                                         | 16       | <b>64.0</b> | 12            | <b>48.0</b> |                |
| No / Don't know                                                                             | 9        | <b>36.0</b> | 13            | <b>52.0</b> |                |
| <b>Do you know where to find information or support to help quit smoking shisha? (n=29)</b> |          |             |               |             | <i>p=1.00</i>  |
| Yes                                                                                         | 7        | <b>24.1</b> | 7             | <b>24.1</b> |                |
| No / Don't know                                                                             | 22       | <b>75.9</b> | 22            | <b>75.9</b> |                |

## Women

|                                                                                             | Baseline |             | Post-campaign |             | <i>p</i> -value |
|---------------------------------------------------------------------------------------------|----------|-------------|---------------|-------------|-----------------|
|                                                                                             | n        | %           | n             | %           |                 |
| <b>Have you seen, heard or read anything about harms of shisha smoking (n=51)</b>           |          |             |               |             | <i>p</i> =0.03* |
| Yes                                                                                         | 21       | <b>41.2</b> | 31            | <b>60.8</b> |                 |
| No or Don't know                                                                            | 30       | <b>58.8</b> | 20            | <b>39.2</b> |                 |
| <b>Shisha contains cancer-causing substances (n=52)</b>                                     |          |             |               |             | <i>p</i> =0.13  |
| Strongly agree                                                                              | 19       | <b>36.5</b> | 28            | <b>53.8</b> |                 |
| Somewhat agree                                                                              | 19       | <b>36.5</b> | 11            | <b>21.2</b> |                 |
| Neutral / Don't know                                                                        | 13       | <b>25.0</b> | 12            | <b>23.1</b> |                 |
| Somewhat disagree                                                                           | 0        | <b>0.0</b>  | 0             | <b>0.0</b>  |                 |
| Strongly disagree                                                                           | 1        | <b>1.9</b>  | 1             | <b>1.9</b>  |                 |
| <b>What are the health effects of smoking shisha compared to cigarettes? (n=52)</b>         |          |             |               |             | <i>p</i> =0.34  |
| Same or more harmful                                                                        | 41       | <b>78.8</b> | 37            | <b>71.2</b> |                 |
| Less harmful or Don't know                                                                  | 11       | <b>21.2</b> | 15            | <b>28.8</b> |                 |
| <b>Smoking shisha can cause damage to your body (n=54)</b>                                  |          |             |               |             | <i>p</i> =0.60  |
| Strongly agree                                                                              | 32       | <b>59.3</b> | 33            | <b>61.1</b> |                 |
| Somewhat agree                                                                              | 14       | <b>25.9</b> | 15            | <b>27.8</b> |                 |
| Neutral / Don't know                                                                        | 7        | <b>13.0</b> | 5             | <b>9.3</b>  |                 |
| Somewhat disagree                                                                           | 1        | <b>1.9</b>  | 1             | <b>1.9</b>  |                 |
| Strongly disagree                                                                           | 0        | <b>0.0</b>  | 0             | <b>0.0</b>  |                 |
| <b>Have you thought about reducing the amount of shisha you smoke? (n=57)</b>               |          |             |               |             | <i>p</i> =1.00  |
| Yes, [Within the next 30 days/ next 6 months/ completely stopping]                          | 24       | <b>42.1</b> | 23            | <b>40.4</b> |                 |
| No / Don't know                                                                             | 33       | <b>57.9</b> | 34            | <b>59.6</b> |                 |
| <b>Have you talked to someone about the harms of smoking shisha? (n=45)</b>                 |          |             |               |             | <i>p</i> =0.21  |
| Yes                                                                                         | 28       | <b>62.2</b> | 22            | <b>48.9</b> |                 |
| No / Don't know                                                                             | 17       | <b>37.8</b> | 23            | <b>51.1</b> |                 |
| <b>Do you know where to find information or support to help quit smoking shisha? (n=51)</b> |          |             |               |             | <i>p</i> =1.00  |
| Yes                                                                                         | 11       | <b>21.6</b> | 11            | <b>21.6</b> |                 |
| No / Don't know                                                                             | 40       | <b>78.4</b> | 40            | <b>78.4</b> |                 |

## Age

### Younger age group (18-26 years old)

|                                                                                             | Baseline |             | Post-campaign |             | <i>p-value</i> |
|---------------------------------------------------------------------------------------------|----------|-------------|---------------|-------------|----------------|
|                                                                                             | n        | %           | n             | %           |                |
| <b>Have you seen, heard or read anything about harms of shisha smoking (n=47)</b>           |          |             |               |             | <i>p=0.21</i>  |
| Yes                                                                                         | 25       | <b>53.2</b> | 31            | <b>66.0</b> |                |
| No or Don't know                                                                            | 22       | <b>46.8</b> | 16            | <b>34.0</b> |                |
| <b>Shisha contains cancer-causing substances (n=47)</b>                                     |          |             |               |             | <i>p=0.18</i>  |
| Strongly agree                                                                              | 19       | <b>40.4</b> | 27            | <b>57.4</b> |                |
| Somewhat agree                                                                              | 16       | <b>34.0</b> | 9             | <b>19.1</b> |                |
| Neutral / Don't know                                                                        | 11       | <b>23.4</b> | 9             | <b>19.1</b> |                |
| Somewhat disagree                                                                           | 0        | <b>0.0</b>  | 1             | <b>2.1</b>  |                |
| Strongly disagree                                                                           | 1        | <b>2.1</b>  | 1             | <b>2.1</b>  |                |
| <b>What are the health effects of smoking shisha compared to cigarettes? (n=46)</b>         |          |             |               |             | <i>p=0.34</i>  |
| Same or more harmful                                                                        | 30       | <b>65.2</b> | 26            | <b>56.5</b> |                |
| Less harmful or Don't know                                                                  | 16       | <b>34.8</b> | 20            | <b>43.5</b> |                |
| <b>Smoking shisha can cause damage to your body (n=50)</b>                                  |          |             |               |             | <i>p=0.36</i>  |
| Strongly agree                                                                              | 28       | <b>56.0</b> | 32            | <b>64.0</b> |                |
| Somewhat agree                                                                              | 14       | <b>28.0</b> | 11            | <b>22.0</b> |                |
| Neutral / Don't know                                                                        | 7        | <b>14.0</b> | 6             | <b>12.0</b> |                |
| Somewhat disagree                                                                           | 1        | <b>2.0</b>  | 1             | <b>2.0</b>  |                |
| Strongly disagree                                                                           | 0        | <b>0.0</b>  | 0             | <b>0.0</b>  |                |
| <b>Have you thought about reducing the amount of shisha you smoke? (n=54)</b>               |          |             |               |             | <i>p=0.63</i>  |
| Yes, [Within the next 30 days/ next 6 months/ completely stopping]                          | 25       | <b>46.3</b> | 28            | <b>51.9</b> |                |
| No / Don't know                                                                             | 29       | <b>53.7</b> | 26            | <b>48.1</b> |                |
| <b>Have you talked to someone about the harms of smoking shisha? (n=42)</b>                 |          |             |               |             | <i>p=0.06</i>  |
| Yes                                                                                         | 26       | <b>61.9</b> | 18            | <b>42.9</b> |                |
| No / Don't know                                                                             | 16       | <b>38.1</b> | 24            | <b>57.1</b> |                |
| <b>Do you know where to find information or support to help quit smoking shisha? (n=52)</b> |          |             |               |             | <i>p=1.00</i>  |
| Yes                                                                                         | 14       | <b>26.9</b> | 13            | <b>25.0</b> |                |
| No / Don't know                                                                             | 38       | <b>73.1</b> | 39            | <b>75.0</b> |                |

### Older age group (27-35 years old)

|                                                                                             | Baseline |             | Post-campaign |             | <i>p-value</i>  |
|---------------------------------------------------------------------------------------------|----------|-------------|---------------|-------------|-----------------|
|                                                                                             | n        | %           | n             | %           |                 |
| <b>Have you seen, heard or read anything about harms of shisha smoking (n=33)</b>           |          |             |               |             | <i>p=0.004*</i> |
| Yes                                                                                         | 11       | <b>33.3</b> | 23            | <b>69.7</b> |                 |
| No or Don't know                                                                            | 22       | <b>66.7</b> | 10            | <b>30.3</b> |                 |
| <b>Shisha contains cancer-causing substances (n=37)</b>                                     |          |             |               |             | <i>p=0.45</i>   |
| Strongly agree                                                                              | 17       | <b>45.9</b> | 20            | <b>54.1</b> |                 |
| Somewhat agree                                                                              | 13       | <b>35.1</b> | 11            | <b>29.7</b> |                 |
| Neutral / Don't know                                                                        | 6        | <b>16.2</b> | 6             | <b>16.2</b> |                 |
| Somewhat disagree                                                                           | 1        | <b>2.7</b>  | 0             | <b>0.0</b>  |                 |
| Strongly disagree                                                                           | 0        | <b>0.0</b>  | 0             | <b>0.0</b>  |                 |
| <b>What are the health effects of smoking shisha compared to cigarettes? (n=35)</b>         |          |             |               |             | <i>p=0.73</i>   |
| Same or more harmful                                                                        | 25       | <b>71.4</b> | 27            | <b>77.1</b> |                 |
| Less harmful or Don't know                                                                  | 10       | <b>28.6</b> | 8             | <b>22.9</b> |                 |
| <b>Smoking shisha can cause damage to your body (n=35)</b>                                  |          |             |               |             | <i>p=0.61</i>   |
| Strongly agree                                                                              | 18       | <b>51.4</b> | 20            | <b>57.1</b> |                 |
| Somewhat agree                                                                              | 14       | <b>40.0</b> | 12            | <b>34.3</b> |                 |
| Neutral / Don't know                                                                        | 2        | <b>5.7</b>  | 3             | <b>8.6</b>  |                 |
| Somewhat disagree                                                                           | 1        | <b>2.9</b>  | 0             | <b>0.0</b>  |                 |
| Strongly disagree                                                                           | 0        | <b>0.0</b>  | 0             | <b>0.0</b>  |                 |
| <b>Have you thought about reducing the amount of shisha you smoke? (n=38)</b>               |          |             |               |             | <i>p=1.00</i>   |
| Yes, [Within the next 30 days/ next 6 months/ completely stopping]                          | 18       | <b>47.4</b> | 18            | <b>47.4</b> |                 |
| No / Don't know                                                                             | 20       | <b>52.6</b> | 20            | <b>52.6</b> |                 |
| <b>Have you talked to someone about the harms of smoking shisha? (n=28)</b>                 |          |             |               |             | <i>p=0.73</i>   |
| Yes                                                                                         | 18       | <b>64.3</b> | 16            | <b>57.1</b> |                 |
| No / Don't know                                                                             | 10       | <b>35.7</b> | 12            | <b>42.9</b> |                 |
| <b>Do you know where to find information or support to help quit smoking shisha? (n=28)</b> |          |             |               |             | <i>p=1.00</i>   |
| Yes                                                                                         | 4        | <b>14.3</b> | 5             | <b>17.9</b> |                 |
| No / Don't know                                                                             | 24       | <b>85.7</b> | 23            | <b>82.1</b> |                 |

## Shisha smoking status

### People who smoke shisha

|                                                                                             | Baseline |             | Post-campaign |             | <i>p</i> -value |
|---------------------------------------------------------------------------------------------|----------|-------------|---------------|-------------|-----------------|
|                                                                                             | n        | %           | n             | %           |                 |
| <b>Have you seen, heard or read anything about harms of shisha smoking (n=56)</b>           |          |             |               |             | <i>p</i> =0.05  |
| Yes                                                                                         | 26       | <b>46.4</b> | 36            | <b>64.3</b> |                 |
| No or Don't know                                                                            | 30       | <b>53.6</b> | 20            | <b>35.7</b> |                 |
| <b>Shisha contains cancer-causing substances (n=57)</b>                                     |          |             |               |             | <i>p</i> =0.22  |
| Strongly agree                                                                              | 17       | <b>29.8</b> | 27            | <b>47.4</b> |                 |
| Somewhat agree                                                                              | 23       | <b>40.4</b> | 13            | <b>22.8</b> |                 |
| Neutral / Don't know                                                                        | 16       | <b>28.1</b> | 15            | <b>26.3</b> |                 |
| Somewhat disagree                                                                           | 0        | <b>0.0</b>  | 1             | <b>1.8</b>  |                 |
| Strongly disagree                                                                           | 1        | <b>1.8</b>  | 1             | <b>1.8</b>  |                 |
| <b>What are the health effects of smoking shisha compared to cigarettes? (n=55)</b>         |          |             |               |             | <i>p</i> =1.00  |
| Same or more harmful                                                                        | 34       | <b>61.8</b> | 34            | <b>61.8</b> |                 |
| Less harmful or Don't know                                                                  | 21       | <b>38.2</b> | 21            | <b>38.2</b> |                 |
| <b>Smoking shisha can cause damage to your body (n=59)</b>                                  |          |             |               |             | <i>p</i> =0.19  |
| Strongly agree                                                                              | 25       | <b>42.4</b> | 31            | <b>52.5</b> |                 |
| Somewhat agree                                                                              | 23       | <b>39.0</b> | 19            | <b>32.2</b> |                 |
| Neutral / Don't know                                                                        | 9        | <b>15.3</b> | 8             | <b>13.6</b> |                 |
| Somewhat disagree                                                                           | 2        | <b>3.4</b>  | 1             | <b>1.7</b>  |                 |
| Strongly disagree                                                                           | 0        | <b>0.0</b>  | 0             | <b>0.0</b>  |                 |
| <b>Have you thought about reducing the amount of shisha you smoke? (n=65)</b>               |          |             |               |             | <i>p</i> =0.52  |
| Yes, [Within the next 30 days/ next 6 months/ completely stopping]                          | 36       | <b>55.4</b> | 40            | <b>61.5</b> |                 |
| No / Don't know                                                                             | 29       | <b>44.6</b> | 25            | <b>38.5</b> |                 |
| <b>Have you talked to someone about the harms of smoking shisha? (n=48)</b>                 |          |             |               |             | <i>p</i> =0.12  |
| Yes                                                                                         | 26       | <b>54.2</b> | 19            | <b>39.6</b> |                 |
| No / Don't know                                                                             | 22       | <b>45.8</b> | 29            | <b>60.4</b> |                 |
| <b>Do you know where to find information or support to help quit smoking shisha? (n=58)</b> |          |             |               |             | <i>p</i> =1.00  |
| Yes                                                                                         | 12       | <b>20.7</b> | 12            | <b>20.7</b> |                 |
| No / Don't know                                                                             | 46       | <b>79.3</b> | 46            | <b>79.3</b> |                 |

## People who don't smoke shisha

|                                                                                             | Baseline |             | Post-campaign |             | <i>p-value</i> |
|---------------------------------------------------------------------------------------------|----------|-------------|---------------|-------------|----------------|
|                                                                                             | n        | %           | n             | %           |                |
| <b>Have you seen, heard or read anything about harms of shisha smoking (n=23)</b>           |          |             |               |             | <i>p=0.04</i>  |
| Yes                                                                                         | 10       | <b>43.5</b> | 17            | <b>73.9</b> |                |
| No or Don't know                                                                            | 13       | <b>56.5</b> | 6             | <b>26.1</b> |                |
| <b>Shisha contains cancer-causing substances (n=26)</b>                                     |          |             |               |             | <i>p=0.41</i>  |
| Strongly agree                                                                              | 18       | <b>69.2</b> | 19            | <b>73.1</b> |                |
| Somewhat agree                                                                              | 6        | <b>23.1</b> | 7             | <b>26.9</b> |                |
| Neutral / Don't know                                                                        | 1        | <b>3.8</b>  | 0             | <b>0.0</b>  |                |
| Somewhat disagree                                                                           | 1        | <b>3.8</b>  | 0             | <b>0.0</b>  |                |
| Strongly disagree                                                                           | 0        | <b>0.0</b>  | 0             | <b>0.0</b>  |                |
| <b>What are the health effects of smoking shisha compared to cigarettes? (n=26)</b>         |          |             |               |             | <i>p=0.73</i>  |
| Same or more harmful                                                                        | 21       | <b>80.8</b> | 19            | <b>73.1</b> |                |
| Less harmful or Don't know                                                                  | 5        | <b>19.2</b> | 7             | <b>26.9</b> |                |
| <b>Smoking shisha can cause damage to your body (n=26)</b>                                  |          |             |               |             | <i>p=0.74</i>  |
| Strongly agree                                                                              | 21       | <b>80.8</b> | 21            | <b>80.8</b> |                |
| Somewhat agree                                                                              | 5        | <b>19.2</b> | 4             | <b>15.4</b> |                |
| Neutral / Don't know                                                                        | 0        | <b>0.0</b>  | 1             | <b>3.8</b>  |                |
| Somewhat disagree                                                                           | 0        | <b>0.0</b>  | 0             | <b>0.0</b>  |                |
| Strongly disagree                                                                           | 0        | <b>0.0</b>  | 0             | <b>0.0</b>  |                |
| <b>Have you thought about reducing the amount of shisha you smoke? (n=26)</b>               |          |             |               |             | <i>p=1.00</i>  |
| Yes, [Within the next 30 days/ next 6 months/ completely stopping]                          | 6        | <b>23.1</b> | 5             | <b>19.2</b> |                |
| No / Don't know                                                                             | 20       | <b>76.9</b> | 21            | <b>80.8</b> |                |
| <b>Have you talked to someone about the harms of smoking shisha? (n=21)</b>                 |          |             |               |             | <i>p=0.45</i>  |
| Yes                                                                                         | 17       | <b>81.0</b> | 14            | <b>66.7</b> |                |
| No / Don't know                                                                             | 4        | <b>19.0</b> | 7             | <b>33.3</b> |                |
| <b>Do you know where to find information or support to help quit smoking shisha? (n=21)</b> |          |             |               |             | <i>p=1.00</i>  |
| Yes                                                                                         | 6        | <b>28.6</b> | 5             | <b>23.8</b> |                |
| No / Don't know                                                                             | 15       | <b>71.4</b> | 16            | <b>76.2</b> |                |
